# Supplementary material for: Prevalence of Pathogens Related to Bovine Respiratory Disease Before and After Transportation in Beef Steers: Preliminary Results
Source: PubMed Central journal article supplement (PMC6940923; doi:10.3390/ani9121093), 2019-12-06
Supplement: animals-09-01093-s001.pdf [file animals-09-01093-s001.pdf]

**Table S1.** Primer and probe sets for the detection of BRD pathogens

| <b>Pathogens</b>      | <b>5'&gt;3' F</b>         | <b>5'&gt;3'R</b>         | <b>5'&gt;3' FAM</b>                |
|-----------------------|---------------------------|--------------------------|------------------------------------|
| <b>BPIV</b>           | TGTCTTCCACTAGATAGA        | GCAATGATAACAGGACTA       | ACAGCAATTGGATCAATA0[MGBEQ]         |
| <b>BVDV</b>           | GGGNAGTCGTCARTGGT         | GTGCCCATGTACAGCAGAGWTTTT | CCAYGTGGACGAGGGCAYGC[TAM]          |
| <b>BCoV</b>           | GGACCCAAGTAGCGATGAG       | GACCTTCCTGAGCCTTCAATA    | ATTCCGACTAGGTTTCCGCCTGG[TAM]       |
| <b>BRSV</b>           | GCAATGCTGCAGGACTAGGTATAAT | ACACTGTAATTGATGACCCCATCT | ACCAAGACTTGTATGATGCTGCCAAAGCA[TAM] |
| <b>BoHV1</b>          | CAATAACAGCGTAGACCTGGTC    | GCTGTAGTCCCAAGCTTCCAC    | TGCGGCCTCCGGGCTTACGTCT[TAM]        |
| <b>BAdV3</b>          | ATTACCAGCGTCAACCTCTAC     | CCGCCGAGAGATAGTCATTAAT   | TCCACTTTGGAAGCTATGCTCCGC[TAM]      |
| <i>M. haemolytica</i> | ATTAGTGGGTTGTCCTGGTTAG    | GCGTGATTTTCGGTTCAGTTG    | CTGAACCAACACGAGTAGTCGCTGC[TAM]     |
| <i>P. multocida</i>   | GGGCTTGTCGGTAGTCTTT       | CGGCAAATAACAATAAGCTGAGTA | CGGCGCAACTGATTGGACGTTATT[TAM]      |
| <i>H. somni</i>       | AAGGCCTTCGGGTTGTAAAG      | CCGGTGCTTCTTCTGTGATTAT   | CGGTGATGAGGAAGGCGATTAG[TAM]        |
| <i>M. bovis</i>       | TCAAGGAACCCACAGAT         | AGGCAAAGTCATTTCTAGGTGCAA | TGGCAAACCTTACCTATCGGTGACCCT[TAM]   |
